1 **BIOLOGICAL SCIENCES**

2

3 CLATHRIN LIGHT CHAIN DIVERSITY REGULATES MEMBRANE DEFORMATION IN  
4 VITRO AND SYNAPTIC VESICLE FORMATION IN VIVO

5

6

7 Lisa Redlingshöfer<sup>1,2</sup>, Faye McLeod<sup>3,+</sup>, Yu Chen<sup>1,2</sup>, Marine D. Camus<sup>1,2</sup>, Jemima J. Burden<sup>4</sup>,  
8 Ernest Palomer<sup>3</sup>, Kit Briant<sup>1,2</sup>, Philip N. Dannhauser<sup>1,2,+</sup>, Patricia C. Salinas<sup>3</sup> and Frances M.  
9 Brodsky<sup>1,2\*</sup>

10

11 <sup>1</sup> Research Department of Structural and Molecular Biology, Division of Biosciences,  
12 University College London, Gower Street, London WC1E 6BT, UK

13 <sup>2</sup> Institute of Structural and Molecular Biology, Birkbeck and University College London,  
14 Malet Street, London WC1E 7HX, UK

15 <sup>3</sup> Research Department of Cell and Developmental Biology, Division of Biosciences,  
16 University College London, Gower Street, London WC1E 6BT, UK

17 <sup>4</sup> Medical Research Council Laboratory for Molecular Cell Biology, University College  
18 London, Gower Street, London WC1E 6BT, UK

19

20 \* to whom correspondence should be addressed:

21 Professor Frances M. Brodsky

22 f.brodsky@ucl.ac.uk

23 + present addresses:

24 Dr Faye McLeod: Faculty of Medical Sciences, Newcastle University, Newcastle upon Tyne,  
25 NE2 4HH, United Kingdom

26 Dr Philip Dannhauser: Miltenyi Biotec B.V. & Co. KG, Friedrich-Ebert-Str. 68, 51429 Bergisch  
27 Gladbach, Germany

28 **ABSTRACT**

29

30 Clathrin light chain (CLC) subunits in vertebrates are encoded by paralogous genes *CLTA*  
31 and *CLTB* and both gene products are alternatively spliced in neurons. To understand how  
32 this CLC diversity influences neuronal clathrin function, we characterised the biophysical  
33 properties of clathrin comprising individual CLC variants for correlation with neuronal  
34 phenotypes of mice lacking either CLC-encoding gene. CLC splice variants differentially  
35 influenced clathrin knee conformation within assemblies, and clathrin with neuronal CLC  
36 mixtures was more effective in membrane deformation than clathrin with single neuronal  
37 isoforms nCLCa or nCLCb. Correspondingly, electrophysiological recordings revealed that  
38 neurons from mice lacking nCLCa or nCLCb were both defective in synaptic vesicle  
39 replenishment. Mice with only nCLCb had a reduced synaptic vesicle pool and impaired  
40 neurotransmission compared to wild-type mice, while nCLCa-only mice had increased  
41 synaptic vesicle numbers, restoring normal neurotransmission. These findings highlight  
42 differences between the CLC isoforms and show that isoform mixing influences tissue-  
43 specific clathrin activity in neurons, which requires their functional balance.

44

45 **KEY WORDS**

46 Clathrin, membrane traffic, coated vesicle formation, protein isoforms, neuronal synapse

47

48 **SIGNIFICANCE STATEMENT**

49

50 This study reveals that diversity of clathrin light chain (CLC) subunits alters clathrin  
51 properties and demonstrates that the two neuronal CLC subunits work together for optimal  
52 clathrin function in synaptic vesicle formation. Our findings establish a role for CLC diversity  
53 in synaptic transmission and illustrate how CLC variability expands the complexity of clathrin  
54 to serve tissue-specific functions.

55

## 56 INTRODUCTION

57

58 Clathrin mediates vesicle formation from the plasma membrane and endosomal  
59 compartments (1). Recruited by cargo-recognising adaptor proteins, triskelion-shaped  
60 clathrin proteins assemble into polyhedral lattices to capture membrane-associated cargo  
61 and promote membrane bending into clathrin-coated vesicles (CCVs). Through sequestration  
62 of a variety of cargo, CCVs play fundamental roles in general cellular physiology including  
63 regulation of nutrient uptake and signalling, as well as in tissue-specific membrane traffic  
64 such as synaptic vesicle (SV) generation (2). This range of clathrin functions has been  
65 attributed to adaptor and accessory protein variation (3). However, functional diversity is also  
66 generated by variability of clathrin subunits. Vertebrates have two types of clathrin heavy  
67 chains with distinct functions (4). The major vertebrate clathrin is formed from clathrin heavy  
68 chain CHC17 (herein referred to as CHC) associated with clathrin light chains (CLCs), which  
69 do not bind the minor CHC22 clathrin isoform. Vertebrate CLCs are encoded by two different  
70 genes *CLTA* and *CLTB* (in humans), producing CLCa and CLCb isoforms of about 60%  
71 sequence identity (5, 6). Their sequence differences have been conserved during evolution,  
72 after the encoding genes arose through duplication, suggesting the two isoforms can mediate  
73 distinct functions (7, 8). Expression levels of the CLCa and CLCb isoforms are tissue-specific  
74 (9), and further variation is created by alternative gene splicing during development (10) and  
75 in brain (5, 6). Here we address how CLC diversity affects the biophysical properties of  
76 clathrin and how the resulting variation affects the specialised function of clathrin in synaptic  
77 vesicle (SV) replenishment.

78

79 Limited functional differences between CLCa and CLCb have been observed in cell culture  
80 with respect to clathrin dynamics (11), during focal adhesion formation (12), cancer cell  
81 migration (13) and in epithelial polarity (14), with mechanisms attributed to isoform-specific  
82 differences in CLC binding proteins and post-translational modification (15). Loss of CLCs in

83 culture and *in vivo* affects CCV uptake of some, but not all cargo, possibly reflecting  
84 variability in mechanical demand for packaging different cargo into CCVs (9, 15, 16). The  
85 capacity for biophysical differences in clathrin comprising different CLC isoforms and their  
86 splicing variants to influence tissue-specific clathrin functions has not yet been considered.  
87 CLC variability has potential to affect clathrin function as CLCs interact with key domains of  
88 the clathrin triskelion that contribute to clathrin-mediated membrane bending. They bind the  
89 trimerisation domain (TxD) of the triskelion vertex where the three component CHCs interact  
90 (17, 18), and extend along the triskelion leg to the bend at the knee where CLCs regulate  
91 conformation (19). Like various other endocytic proteins (3), CLCs undergo neuron-specific  
92 splicing (20), which introduces one exon in CLCb (encoding 18 residues) and two exons  
93 (encoding 30 residues) in CLCa at equivalent positions near the CLC C-termini, resulting in  
94 higher molecular weight forms nCLCb and nCLCa (5, 6), suggesting neuron-specific  
95 functions for these variants. *In vitro*, CLCs are required for efficient clathrin-mediated  
96 membrane vesiculation at low temperature (21). Thus, CLCs could affect clathrin-mediated  
97 membrane deformation directly through their influence on clathrin lattice properties (21, 22),  
98 as well as indirectly through cellular interaction with proteins that influence the actin  
99 cytoskeleton (14, 23-25).

100

101 SV replenishment by membrane traffic following neuronal degranulation is critical for  
102 sustained neurotransmission. Endocytosis is required to regulate synaptic plasma membrane  
103 surface area and to retrieve SV proteins (26), and SVs are generated from the plasma  
104 membrane and endosome-like compartments (27). The essential sites of clathrin function in  
105 these pathways are debated (2, 28), but dysfunction of clathrin-associated endocytic proteins  
106 is associated with neurological defects observed in Parkinson's disease (29), Alzheimer's  
107 disease (3) and in numerous animal models in which such proteins have been genetically  
108 deleted (30-35).

109

110 Here, we assess how clathrin lattices formed with neuronal and non-neuronal CLC variants  
111 could differentially affect function by correlating their *in vitro* biophysical properties with *in*  
112 *vivo* neuronal phenotypes of mice lacking CLC-encoding genes. We found that CLC  
113 composition significantly influenced clathrin lattice properties and the ability to form vesicles.  
114 CLC splice variation impacted assembly curvature by regulating CHC knee conformation,  
115 resulting in decreased ability of individual neuronal splice variants to deform liposome  
116 membrane *in vitro*. This effect was ameliorated for lattices formed from a mixture of neuronal  
117 CLC isoforms. Mice lacking either CLCa or CLCb isoforms showed corresponding  
118 differences in SV replenishment and synaptic neurotransmission compared to their wild-type  
119 (WT) littermates expressing both isoforms, and to each other. Collectively, these functional  
120 differences between CLC isoforms observed *in vitro* and *in vivo* establish a role for CLC  
121 diversity in regulating clathrin function in neurons and suggest a critical role for isoform  
122 balance.  
123

124 **RESULTS**

125

126 **CLC splice variants differentially influence lattice curvature via the triskelion knee**

127 Within clathrin lattices, the knee bending angle determines whether a hexagon (non-  
128 curvature inducing) or pentagon (curvature-inducing) is formed (36, 37). In addition, the  
129 characteristic pucker at the triskelion vertex and the crossing angle of interacting CHC legs  
130 can further modulate lattice curvature (38, 39) (Fig. 1a). This versatility of clathrin assemblies  
131 allows clathrin to sequester cargo of various sizes as well as to form stable, flat assemblies  
132 that serve as signalling hubs (3, 40). For each closed cage, there is a fixed number of 12  
133 pentagons, but a varying number of hexagons (41) (Fig. 1a). Thus, larger cages (i.e. lattices  
134 of lower curvature) have a smaller pentagon to hexagon ratio. CLCs maintain the puckered  
135 conformation of triskelia in flat assemblies (21) and structural studies showed that nCLCb  
136 can influence conformation of the triskelion knee up to a degree that inhibits assembly (19).  
137 Considering these effects on CHCs, we hypothesized that sequence differences between the  
138 CLC isoforms and alterations due to splicing might modulate CLC influence on triskelion  
139 conformation and lattice curvature.

140

141 To address this, we produced clathrin triskelia of defined CLC composition by reconstituting  
142 tissue-derived CHC triskelia (42) with recombinantly expressed CLCa, CLCb, nCLCa or  
143 nCLCb (SI Appendix, Fig. S1a-d). We then induced assembly of these different clathrins into  
144 closed cages and analysed cage diameter as a measure of lattice curvature by electron  
145 microscopy. Previous studies showed that tissue-derived, CLC-bound clathrin (native) forms  
146 two major size classes, while CHC-only triskelia predominantly form small-sized cages (43-  
147 46). Our results confirmed that without CLCs, CHC formed predominantly cages of less than  
148 90 nm in diameter with an average size of around 70 nm, representing cages of up to 60  
149 triskelia (45). Clathrin with each of the CLC variants was further able to form larger cages  
150 with an average diameter of around 110 nm (140 triskelia) for those cages. The degree to

151 which larger cages were formed varied significantly between splice variants (Fig. 1b, c),  
152 indicating that the neuronal splice inserts regulate the influence of CLCs on lattice curvature.  
153  
154 To establish whether differences in larger cage formation resulted from CLC influence on the  
155 triskelion vertex or on the CHC knee conformation or both, we dissected the effect of CLCs  
156 separately for each domain. To test whether CLC diversity exerts influence through varying  
157 CHC knee conformation, we produced clathrin cages from two CHC fragments that together  
158 constitute a full-length clathrin triskelion “cut” at the knee (Fig. 1d) (47). The Hub fragment  
159 (residues 1074-1675) was reconstituted with different CLCs (48) and combined with the  
160 terminal-distal leg segment (TDD, residues 1-1074, SI Appendix, Fig. S1e) under conditions  
161 promoting their co-assembly (47). Cages produced when TDD was combined with CLC-  
162 reconstituted Hub fragments were similar in size to fragment cages without CLCs, and the  
163 larger cages observed for CLC variants associated with intact CHC did not form (Fig. 1d, e).  
164 This result demonstrates that for CLC diversity to exert an effect on lattice curvature, the  
165 CHC knee must be intact, and shows that CLC splice variants differ in their influence on CHC  
166 knee conformation. Formation of larger cages by neuronal CLCs suggests that the neuronal  
167 splice inserts restrict the conformational flexibility of the CHC knee and could thereby reduce  
168 the likelihood of pentagon over hexagon formation. Non-neuronal CLCs appear to support a  
169 less biased variety of knee conformations, as cages of the two size classes are observed at  
170 almost equal frequency (Fig. 1b, c). To establish whether cage size differences also  
171 correlated with CLC effects at the TxD, the different CLCs were compared for their ability to  
172 stabilise the TxD (SI Appendix, Fig. S2) in an assay that measures triskelion dissociation.  
173 While dissociation differences were observed between triskelia reconstituted with the  
174 different CLC isoforms and their splice variants, these effects did not correlate with cage size  
175 differences, suggesting that CLC influence at the vertex is not a major factor in lattice  
176 curvature.  
177  
178



179 **CLC diversity modulates mechanical properties of the clathrin lattice**

180 We next investigated whether the influence of CLCs on the CHC knee had mechanical  
181 consequences for their ability to support membrane deformation. Mechanical properties of  
182 clathrin lattices were previously shown to be CLC-dependent and reduced ability of CLC-free  
183 clathrin to bend membranes *in vitro* was correlated with reduced planar lattice quality when  
184 assembled on an electron microscopy (EM) grid (21). To establish whether CLC diversity  
185 influences lattice quality in the same assay, clathrins with different CLC composition were  
186 assembled on EM grids coated with a clathrin-binding fragment of epsin1 (H<sub>6</sub>-ΔENTH-  
187 epsin<sup>144-575</sup>, SI Appendix, Fig. S1f) (49). The flat lattices formed were visualized by EM and  
188 their periodicity (quality) assessed by Fourier transform analysis. Lattice quality was  
189 significantly reduced for clathrin with the neuronal splice variants of either CLCa or CLCb  
190 compared to clathrin reconstituted with their respective non-neuronal variants, and was  
191 significantly improved if formed from a 1:1 mix of nCLCa clathrin and nCLCb clathrin (Fig. 2).  
192 To visualise the nature of CLC distribution in these mixtures, lattices were generated using  
193 His-tagged nCLCa clathrin or nCLCb clathrin combined with the cognate untagged CLC and  
194 labelled with Ni-NTA-gold (SI Appendix, Fig. S3), confirming a uniform distribution of each  
195 neuronal CLC within the mixed lattice. In contrast to the behaviour of the neuronal CLCs,  
196 lattice quality was reduced in mixtures of CLCa clathrin and CLCb clathrin compared to  
197 lattices formed by clathrin with only CLCa or CLCb.

198

199 To determine whether CLC-related variation in lattice quality correlated with membrane  
200 bending efficacy, as seen for complete absence of CLCs, we tested the function of the CLC-  
201 reconstituted clathrins using a low temperature *in vitro* budding assay (21). In this assay, H<sub>6</sub>-  
202 ΔENTH-epsin<sup>144-575</sup>, coupled to liposomes via modified Ni-NTA lipids, captures clathrin at the  
203 liposome surface. Lattice assembly on these liposomes can generate mature buds, which  
204 remain attached to the liposome due to lack of dynamin, needed for scission (21, 49). The  
205 efficiency of clathrin with different CLC composition to form such coated buds was assessed  
206 at 15°C, a temperature permissive for budding by native clathrin but reduced for CLC-free

207 clathrin (21). For each reconstituted clathrin, we measured the diameter of clathrin-coated  
208 membrane profiles in thin-section electron micrographs and assessed budding efficiency by  
209 the percentage of mature clathrin-coated buds (defined by a fitted diameter < 200 nm)  
210 relative to the total clathrin-coated membrane observed including shallow pits and flat clathrin  
211 assemblies (defined by a fitted diameter > 200 nm) (Fig. 3a). In line with previous findings,  
212 we found that at 15°C native clathrin was about twice as effective in membrane deformation  
213 as CLC-free clathrin (21), and that budding efficiency varied with the CLC composition of  
214 clathrin tested (Fig. 3b). CLCa or CLCb clathrin lattices generated mature membrane buds  
215 more efficiently than clathrin with either single neuronal clathrin variant (Fig. 3b, c),  
216 demonstrating that CLC splicing affects budding. Visualising the clathrin-coated liposomes  
217 absorbed to EM grids confirmed that all clathrins tested assembled into intact lattices or buds  
218 on the liposome surface (SI Appendix, Fig. S4), suggesting that the observed variation in  
219 budding was not due to impaired lattice formation, but CLC-dependent lattice properties (21).  
220 Notably, mixing reconstituted neuronal clathrins significantly improved budding efficiency  
221 compared to clathrins with only one type of neuronal CLC (Fig. 3d), overall reflecting the  
222 same pattern as observed for both lattice quality and curvature (Table 1), suggesting all three  
223 parameters result from differential CLC effects at the triskelion knee. Furthermore, all three  
224 assays demonstrated that neuronal clathrin benefits from cooperative co-assembly of clathrin  
225 with both isoforms.

226

227 Membrane deformation could result either from lattice formation at constant curvature or  
228 through transitioning from flat to curved lattices (Fig. 3e). Morphological analyses of clathrin-  
229 coated pits in human cell lines suggest that clathrin initially assembles into flat lattices at the  
230 plasma membrane and then gradually deforms the underlying membrane into coated buds  
231 (50, 51). To determine whether clathrin displayed these budding characteristics in our *in vitro*  
232 system and whether they are influenced by CLCs, we adopted the same EM-based  
233 approach. In micrographs of clathrin buds formed on liposomes, we measured the angle  
234 between the convex side of the coat and the coat-free membrane (Fig. 3e), coat curvature

235 (i.e. diameter of the clathrin-coated structure), coat length and neck width for all coated  
236 membrane profiles (50) and then correlated these measurements. We observed a variety of  
237 coat curvatures (Fig. 3f) and found that neck width decreased with bud angle (Fig. 3g), as  
238 would be expected for both modes of deformation. Additionally, coat diameter correlated with  
239 the bud angle, characteristic of curvature transition (Fig. 3h), while we found no correlation  
240 between coat length and budding angle (Fig. 3i). Although this analysis is based on fixed  
241 structures at equilibrium, results were consistent with a flat to curved lattice transition, rather  
242 than assembly with constant curvature (Fig. 3h, i). Thus, we conclude that budding in our *in*  
243 *vitro* system displays the same characteristics as observed in cells (50, 51), where curvature  
244 is most likely generated gradually through lattice rearrangement. Collectively, our results  
245 suggest that CLC splice variants and mixtures thereof differ in their ability to promote this  
246 transition and that this is due to variable restrictive influence on the flexibility of the triskelion  
247 knee within the lattice, which in turn affects clathrin's mechanical ability to deform membrane  
248 into coated buds (Table 1).

249

### 250 **CLC composition affects SV pool size and replenishment**

251 Our *in vitro* experiments suggest that the CLCs differentially affect clathrin's ability to deform  
252 membrane, with the neuronal isoforms working in conjunction for efficient membrane  
253 budding. Therefore, we predicted that neurons of animals with only one CLC isoform might  
254 be defective in clathrin-mediated pathways that rely on SV formation. This hypothesis was  
255 investigated in knock-out (KO) mice lacking the *CltA* or *CltB* genes in all tissues (CLCa KO  
256 and CLCb KO mice). We previously generated CLCa KO mice (9) and have now produced  
257 CLCb KO mice. Loss of *CltB* in CLCb KO mice was confirmed by PCR, and no CLCb or  
258 nCLCb protein was detected in all tissues analysed (SI Appendix, Fig. S5). Whereas wild-  
259 type (WT) mice express a mixture of CLCs in most tissues (9), CLCa KO mice express only  
260 CLCb or nCLCb, and CLCb KO mice express only CLCa or nCLCa, enabling functional  
261 analysis of clathrin with only one type of CLC in neurons (Fig. 4a).

262

263 Hippocampal neurons have frequently been used to study the function of endocytic proteins  
264 in synaptic transmission (27, 30, 31, 33, 34, 52). H&E staining of the hippocampus showed  
265 no morphological abnormalities in either KO strain, indicating that absence of either CLC  
266 isoform does not affect gross hippocampus development in the CLC KO mice (SI Appendix,  
267 Fig. S6). We therefore analysed the adult hippocampus in the CLC KO and WT mice to  
268 evaluate the function of mature excitatory synapses in the CA1 region, a region of well-  
269 defined neuronal architecture and neurophysiological circuitry. For electrophysiological  
270 recordings at Schaffer collateral (SC)-CA1 synapses in acute hippocampal slices, a  
271 stimulating electrode was placed in the SC fibres of the CA3 region and responses were then  
272 recorded in the CA1 pyramidal cell layer (Fig. 4b).

273

274 To determine the role of CLC diversity in SV pool replenishment *in vivo*, we recorded the  
275 responses to a prolonged high-frequency stimulus, which maximally depletes presynaptic  
276 terminals of the readily releasable pool (RRP) of SVs (53-55). Under these conditions, initial  
277 responses would draw from the pre-existing SV pool, while sustained neurotransmission  
278 would rely on the efficiency of SV pool replenishment (54). Using this approach, we were  
279 able to assess CLC-dependency for different stages of SV exo- and endocytosis from these  
280 recordings. We found that the initial fusion efficiency of SVs in either KO strain was similar to  
281 that of their WT littermates, indicating that packaging of fusion-mediating cargo was not  
282 affected by changes in CLC composition (Fig. 4c, d and SI Appendix, Fig. S7). Instead, both  
283 KO models had a decreased SV recycling rate characteristic of a defect in acute SV pool  
284 replenishment (Fig. 4c, d and SI Appendix, Fig. S7). This finding correlated with our  
285 expectation from the *in vitro* studies that showed clathrin lattices with only one type of  
286 neuronal CLC were different from mixed lattices in their assembly properties (Table 1).

287

288 Further calculations based on data obtained from sustained trains of action potentials  
289 indicated that the RRP was larger in the CLCb KO mice but reduced in the CLCa KO mice  
290 when compared to WT littermates (Fig. 4c, d and SI Appendix, Fig. S7), revealing a

291 phenotype that we did not expect from our *in vitro* data. To establish whether the SV  
292 formation was altered in the CLC KO mice rather than the ability to mobilise SVs from other  
293 SV pools, we assessed the ultrastructure of excitatory synapses in the CLC KO mice and  
294 their WT littermates (Fig. 4e). Indeed, SV density was significantly reduced in hippocampal  
295 neurons in the CLCa KO animals. In contrast, SV density in equivalent neurons of the CLCb  
296 KO mice was significantly increased compared to their WT littermates (Fig. 4f, j), in line with  
297 our RRP estimates from electrophysiological recordings (Fig. 4c, d). Other parameters such  
298 as individual SV size (Fig. 4g, k), postsynaptic density (PSD) length (Fig. 4h, l) and excitatory  
299 synapse density (Fig. 4i, m) were similar between both KO strains and respective WT  
300 littermates. Together, these data show that CLCs are required for efficient and sustained  
301 synaptic function and suggest that loss of either CLC decreases acute SV replenishment by  
302 affecting immediate formation, correlating with expectations from reduced *in vitro* budding  
303 efficiency, but that the KO strains differ in their ability to generally maintain SV pools. Thus,  
304 CLC composition influences SV density in excitatory neurons of the hippocampus, and  
305 nCLCa and nCLCb function differently in SV generation such that mice with only nCLCa can  
306 sustain a compensatory pathway for SV generation and mice with only nCLCb cannot.

307

### 308 **CLCa KO and CLCb KO mice have distinct neurological and behavioural defects**

309 To further investigate the differential consequences of CLCa or CLCb KO for synapse  
310 function, we conducted additional electrophysiological experiments to characterise synaptic  
311 transmission in our KO animals. Analyses of the evoked excitatory postsynaptic current  
312 (EPSC) responses to stimuli of increasing magnitude revealed decreased EPSC response  
313 amplitude in the CLCa KO mice compared to WT littermates, suggesting impaired basal  
314 synaptic transmission in the CLCa KO mice (Fig. 5a). In contrast, the evoked EPSC  
315 response amplitude in hippocampal slices from the CLCb KO mice was of similar or higher  
316 magnitude than that of their WT littermates, suggesting that basal synaptic transmission was  
317 intact and even enhanced (Fig. 5b). These differences in synaptic connectivity between  
318 hippocampal function in the two KO strains could arise from defects in presynaptic

319 neurotransmitter release correlating with differences in SV pool size in the KO animals  
320 relative to their WT littermates (Fig. 4).  
321  
322 We then performed paired-pulse ratio (PPR) recordings experiments, an approach that  
323 allows assessment of defects in neurotransmitter release (56, 57). In excitatory neurons such  
324 as those analysed here, a second stimulus pulse ( $P_2$ ) fired in short succession after an initial  
325 pulse ( $P_1$ ) results in a larger response than the first stimulus. This facilitation is dependent on  
326 changes in the probability of neurotransmitter release. PPR is inversely correlated with  
327 release probability, as a lower initial release probability leaves more vesicles remaining at the  
328 terminal which are then capable of being released after the second stimulus (56, 57). We  
329 observed that, compared to WT littermates, the PPR was increased in CLCa KO mice,  
330 consistent with a reduction in release probability (Fig. 5c). In contrast, no differences in PPR  
331 were observed in CLCb KO mice compared to WT littermates (Fig. 5d). Thus, specific loss of  
332 nCLCa impairs presynaptic function compromising neurotransmitter release at the SC-CA1  
333 synapse. Collectively, our electrophysiological data support the morphological data (Fig. 4e-  
334 m), indicating that neurons with only nCLCa clathrin can compensate for defective SV  
335 regeneration by expanding their SV pool from another pathway, while neurons with only  
336 nCLCb clathrin cannot compensate and show decimated SV pools from impaired  
337 replenishment.  
338  
339 Ongoing breeding of the CLCa KO colony confirmed a 50% survival rate compared to that  
340 expected for homozygous CLCa KO mice (9), whereas homozygous CLCb KO mice had no  
341 survival defects (Fig. 5e). Survival phenotypes similar to the CLCa KO animals have been  
342 reported for other genetic deletions in endocytic pathways, which also displayed neuronal  
343 phenotypes (30) in the hippocampus and other regions of the brain (32). Therefore, we  
344 assessed performance in the rotarod test for neuro-motor coordination for both CLC KO mice  
345 (58). Compared to their WT littermates, surviving CLCa KO mice displayed defects in rotarod  
346 balance, whereas CLCb KO mice did not (Fig. 5f). Further assessment of sensorimotor

347 function revealed that CLCa KO mice exhibited defects in a grid-walking test (Fig. 5g), but  
348 not in grip strength (Fig. 5h), suggesting neurological rather than muscular dysfunction in the  
349 CLCa KO animals, supporting the notion that loss of nCLCa is less tolerable than loss of  
350 nCLCb. Together, the phenotypes of the KO animals indicate that neuronal CLC isoforms are  
351 differentially able to support compensatory mechanisms for adjusting SV pools hippocampal  
352 synapses with impaired acute SV replenishment, and suggest that clathrin with only nCLCa  
353 enables more functions than clathrin with only nCLCb, while a mix of both neuronal CLCs is  
354 necessary for optimal clathrin function in neurons, in keeping with their synergistic  
355 contribution to clathrin function *in vitro*.  
356

357 **DISCUSSION**

358

359 To understand the consequences of CLC diversity for clathrin function, we characterised the  
360 biophysical properties of *in vitro* assemblies formed from clathrin comprising single CLC  
361 isoforms and correlated these properties with neuronal phenotypes observed in KO animals  
362 expressing single CLC isoforms. We found that neuronal CLC splicing affects lattice  
363 properties (Fig. 1b and Fig. 2b) by diversifying the CLC influence on the CHC knee to  
364 regulate lattice curvature (Fig. 1c, d) and deform membrane (Fig. 3b). Our *in vitro* studies  
365 further suggest that lattices formed from mixtures of clathrin with nCLCa and nCLCb have  
366 different assembly properties and are more efficient in membrane deformation compared to  
367 clathrin with only one type of neuronal CLC (Fig. 2b, 3d). Consistent with this observation,  
368 neurons from both CLCa and CLCb KO mice showed defects in synaptic transmission that  
369 indicated acute clathrin-dependent SV replenishment was impaired (Fig. 4c, d). However, the  
370 CLCa KO mice had reduced numbers of SVs in their hippocampal synapses, while the CLCb  
371 KO mice had more SVs than their WT littermates (Fig. 4f, j). Thus, although acute SV  
372 replenishment was impaired in both KO strains, clathrin with only nCLCa (in the CLCb KO  
373 mice) was able to support a compensatory pathway of SV formation, while clathrin with only  
374 nCLCb (in the CLCa KO) was not (Fig. 5a-d). These findings establish functional differences  
375 between CLC isoforms *in vitro* and *in vivo* and demonstrate how resulting clathrin diversity,  
376 as well as CLC isoform balance, are important for clathrin function in neurons.

377

378 Neuronal splicing predominates for CLCb in neurons (59), while neuronal CLCs are not  
379 present in other brain cells such as glial or Schwann cells (20), indicating that the CLC splice  
380 variants segregate within brain cell types to fulfil distinct functions. Neuronal CLC variation  
381 due to splicing had a significant influence on lattice curvature and budding efficiency.  
382 Compared to clathrin with non-neuronal CLCs, clathrin with neuronal CLCs formed  
383 predominantly large cages in solution (with low a pentagon to hexagon ratio), suggesting that  
384 through their influence on the CHC knee (Fig 1d), the spliced inserts reduce triskelion



385 flexibility to accommodate pentagonal faces. When constrained to a flat, solid surface (EM  
386 grid), lattice assembly requires significant deformation of triskelia (21). The quality of lattices  
387 formed by clathrin with neuronal CLCs under these conditions was reduced compared to  
388 clathrin with non-neuronal CLCs, further suggesting that neuronal CLCs restrict clathrin's  
389 conformational flexibility. Notably, CLC-dependent lattice quality and cage size correlated  
390 with the ability of clathrin with different CLCs to produce mature buds at liposome  
391 membranes, which morphological analysis suggested are generated by flat lattice  
392 rearrangement, as observed at cell membranes (50, 51). Together, these results suggest  
393 that CLC splicing variation influences clathrin's flexibility to form and alternate between a  
394 range of morphologies in order to deform lipid membrane into mature clathrin-coated buds,  
395 and that this is attributable to CLC influence on the CHC knee domain.

396

397 Given that the inserted sequences are located near the TxD where the C-termini of CLCs are  
398 bound (arrowheads, Fig. 6a), we propose that the splice inserts affect the conformation of the  
399 adjacent knee of a neighbouring triskelion, which is closer to the inserted sequences than the  
400 knee of the triskelion to which the CLC is bound (Fig. 6b). This intermolecular influence could  
401 involve splice inserts at the C-terminus (stars, Fig. 6b) interacting with the neighbouring CHC  
402 knee or with the N-terminal domain (N) of a CLC bound to the neighbouring knee (Fig. 6b).  
403 Considering the average 40% sequence differences between CLCa and CLCb isoforms and  
404 their even greater variation at the N-terminus, inter-CLC interactions could vary depending  
405 on which splice isoform interacts with which CLC isoform N-terminus, thereby influencing  
406 overall lattice properties. This imputed interaction may be lost from clathrin with non-neuronal  
407 CLCs, which would explain why mixing non-neuronal CLC isoforms does not affect *in vitro*  
408 membrane deformation to the same extent as mixing neuronal CLC isoforms (Fig. 3d).

409

410 Here, we characterise the properties of homo- and hetero-assemblies of clathrin comprising  
411 single CLC isoforms. In brain, CLC isoforms are apparently randomly distributed on triskelia  
412 (60), in which case neuronal inserted sequences could still influence lattice curvature via

413 interactions with an adjacent triskelion knee. The presence of nCLCb would serve as an  
414 attenuator of nCLCa-specific interactions and vice versa. Further, in cells where CLCb  
415 expression is transiently increased (61), newly synthesized triskelia would be generally  
416 occupied by a single CLC isoform as clathrin subunit turnover is slow (62). The resulting  
417 homotypic clathrins would then participate mixed in lattices, as we have studied here. Thus,  
418 neuronal CLC isoform expression ratios (and/or local abundance within cells) could tailor  
419 clathrin lattice properties specifically to particular needs.

420

421 There are several pathways involved in SV recycling in neurons and the role of clathrin has  
422 been widely debated, possibly because the contribution of each pathway to SV formation is  
423 variable between organisms, types of neurons and stimulus (52, 63, 64). SV recycling can  
424 either be achieved by direct regeneration of SVs through clathrin-mediated endocytosis from  
425 the plasma membrane at low-frequency stimulus, or through clathrin-independent  
426 mechanisms, which predominantly mediate retrieval of SV components from the plasma  
427 membrane under high stimulus (2, 27, 28, 33, 52). Rapid clathrin-dependent trafficking of SV  
428 proteins from the endosomal pathway then leads to re-sorting and formation of SVs at high-  
429 frequency stimulus (2), which can occur in a timeframe of 1-3 seconds after stimulation (27).

430 In our analysis of neurotransmission, SV recycling defects were detected by  
431 electrophysiology within three seconds at high stimulus (20 Hz for 3s), suggesting the  
432 defects detected were due to impaired clathrin-mediated regeneration of SVs from the  
433 endosomal pathway. These findings are consistent with previously observed roles for CLCs  
434 in recycling from non-neuronal endosomal compartments (61, 65).

435

436 That neurons in both CLC KO strains shared an acute defect in SV pool replenishment fits  
437 with our *in vitro* biophysical data that demonstrate single neuronal CLCs are not as efficient  
438 in membrane deformation as a mixture of clathrin with both neuronal CLCs (Fig. 3d). In  
439 response to this defect, we found that clathrin with only nCLCa generated an increased  
440 steady-state SV pool in CLCb KO neurons, while clathrin with only nCLCb could not (Fig. 4).

441 CLCa seems to have preferential connection with the actin cytoskeleton compared to CLCb  
442 (12, 14), which might account for the ability of nCLCa clathrin to function on its own without  
443 nCLCb and benefit from involvement of actin and its accessory molecules in this  
444 compensatory pathway. It is possible that in the (normal) presence of nCLCb, the actin  
445 interactions of nCLCa may be “diluted down”, so that nCLCb works as an attenuating  
446 balancing mechanism to control SV pools at steady state. The presence of nCLCb would  
447 simultaneously create lattice properties for efficient CCV budding during neurotransmission.  
448 In its absence, the acute replenishment pathway would decrease in efficiency but loss of the  
449 nCLCb attenuation effect enables a compensatory pathway with nCLCa only (Fig. 6c). Thus,  
450 the budding defect resulting from a change in biophysical properties of clathrin is detectable  
451 only under acute demand, and when demand is less acute, there are mechanisms by which  
452 nCLCa clathrin can generate SVs that are not supported by nCLCb clathrin.

453

454 Considering the whole animal phenotypes, including the increased mortality rate for CLCa  
455 but not CLCb KO animals, CLCa seems able to sustain house-keeping clathrin functions,  
456 while CLCb functions mainly in conjunction with CLCa, apparently in a regulatory capacity,  
457 such that a balance between the two is required for some specialised functions. This is in line  
458 with the observation that CLC expression ratios vary with tissue, and while lymphoid cells  
459 almost exclusively express CLCa, no tissue has been found to express exclusively CLCb (9,  
460 62). CLC isoform splicing changes during cell differentiation, development (10, 59) and ratios  
461 of CLCb relative to CLCa are modulated in tumour progression (13) and cell migration (61).  
462 These observations, in combination with the *in vitro* and *in vivo* data reported here, support  
463 the concept that, in addition to influencing accessory protein interaction, the conserved CLC  
464 isoform and splicing differences characteristic of vertebrates facilitate tissue-specific clathrin  
465 functions by directly modulating clathrin lattice properties. In particular, CLC diversity  
466 regulates clathrin budding efficiency, a property that we show here affects SV formation  
467 under acute demand, and is likely to influence other pathways that rely on rapid clathrin-  
468 mediated membrane traffic.

469 **MATERIALS AND METHODS**

470

471 **Protein expression and purification**

472 Except for full-length CHC, all proteins were recombinantly expressed in bacteria and purified  
473 by standard affinity and size exclusion chromatography methods as specified in SI Appendix,  
474 Materials and Methods. Native clathrin and full length CHC were prepared from porcine brain  
475 as specified in SI Appendix, Materials and Methods.

476

477 **Characterisation of clathrin lattice properties**

478 For lattice curvature determination, cage assembly was induced by dialysis in assembly-  
479 promoting buffer A (100 mM MES, 1 mM EGTA, 0.5 mM MgCl<sub>2</sub>, 2 mM CaCl<sub>2</sub>) and cage size  
480 distributions analysed from EM images as specified in SI Appendix, Materials and Methods.  
481 Flat lattices were produced and analysed as previously described (21) and as detailed in SI  
482 Appendix, Material and Methods. Lattice regularity was assessed from electron micrographs  
483 of similar quality and various focuses for each specimen as a measure of lattice quality. 5-12  
484 images were analysed for each reconstituted clathrin isoform within each of three  
485 independent sets of experiments. *In vitro* budding was performed as previously described  
486 (49). In brief, H<sub>6</sub>-ΔENTH-epsin<sup>144-575</sup> was bound to liposomes made from brain polar lipid  
487 extracts containing 5% DGS-Ni-NTA lipids (Avanti). H<sub>6</sub>-ΔENTH-epsin<sup>144-575</sup>-coated liposomes  
488 were then chilled to 15°C and mixed with clathrin triskelia at 15°C, incubated for 30 min at  
489 15°C and then transferred to ice. Samples were then fixed at 4°C overnight and processed  
490 for EM analysis. Diameter, coat length, bud angle and neck width of clathrin-coated  
491 membrane profiles were measured from electron micrographs using ImageJ (NIH) and data  
492 processed using Prism (GraphPad). Between 150 and 200 coat profiles, randomly sampled  
493 across four thin sections, were analysed for each sample (> 60,000 nm total coat length per  
494 experiment per sample). The proportion of mature buds, defined by a diameter of less than  
495 200 nm, of all clathrin-coated membrane profiles examined, was used as a measure of

496 budding efficiency. Results from 3-5 independent sets of experiments were tested for  
497 statistical significance.

498

#### 499 **Generation of CLC KO mice**

500 The *Cltb*<sup>ko/ko</sup> mouse strain was created from ES cell clone 19159A-F4, generated by  
501 Regeneron Pharmaceuticals, Inc., and obtained from the KOMP Repository ([www.komp.org](http://www.komp.org)).  
502 Methods used to create the CLCb-null ES cell clone have previously been published (66). In  
503 brief, the complete coding region of the *Cltb* gene was fully deleted by homologous  
504 recombination using a large BAC-based targeting vector. Targeted ES cells were then  
505 injected into albino C57BL/6J-N blastocytes and transferred into foster mothers. Chimeric  
506 offspring were mated with C57BL/6J females (Charles River), and germ-line transmission of  
507 the *Cltb*-null allele (*Cltb*<sup>ko</sup>) was established. Heterozygote *Cltb*<sup>ko/+</sup> mice were backcrossed on  
508 the C57BL/6 background and bred to produce *Cltb*<sup>ko/ko</sup> homozygous mice. CLCa KO mice  
509 were derived from C57BL/6 WT mice (9) and produced by breeding *Clta*<sup>ko/+</sup> heterozygotes.  
510 WT littermates from the same breedings were used as controls for homozygous KO  
511 animals. All procedures involving animals were conducted according to the Animals Scientific  
512 Procedures Act UK (1986) and in compliance with the ethical standards at University College  
513 London (UCL).

514

#### 515 **Analysis of protein expression in brain**

516 Mouse brains were harvested from six 9-12-month old C57BL/6 WT and homozygous CLCa  
517 and CLCb KO mice and snap-frozen in liquid nitrogen and stored at -80°C until further use.  
518 Tissue were quickly thawed and homogenised in lysis buffer (50 mM HEPES pH 8.0, 50 mM  
519 NaCl, 1% Triton-X 100, 5 mM EDTA, 2 mM CaCl<sub>2</sub>, 1 mM PMSF, cOmplete™ Protease  
520 Inhibitor Cocktail mix (Roche)). The homogenate was further incubated on ice for 45 min  
521 before centrifugation at 21,000 g and 4°C for 2 x 10 min in an Eppendorf 5424 R benchtop  
522 centrifuge (Eppendorf). Protein content of the lysate was determined by BCA assay (Thermo

523 Fisher). For analysis, 25 µg of sample was loaded on 4-15% acrylamide gels (Bio-Rad) and  
524 subjected to SDS-PAGE and immunoblotting. Primary antibodies used for immunoblotting  
525 were TD.1 (anti-CHC, made in house) (67), X16 (anti-CLCa, made in house) (68), CLTB  
526 (anti-CLCb, Proteintech) and anti-beta-actin (Sigma-Aldrich).

527

## 528 **Electrophysiology**

529 Experiments were performed in 8-10-month-old mice. Both male and female mice were used  
530 for electrophysiological experiments. Acute transverse hippocampal slices (300 µm) of  
531 homozygous CLCa or CLCb KO and control mice were cut on a Leica VT-1000 vibratome in  
532 ice-cold artificial cerebrospinal fluid (ACSF) bubbled with 95% O<sub>2</sub>/5% CO<sub>2</sub> containing (in  
533 mM): NaCl (125), KCl (2.4), NaHCO<sub>3</sub> (26), NaH<sub>2</sub>PO<sub>4</sub> (1.4), D-(+)-Glucose (20), CaCl<sub>2</sub> (0.5)  
534 and MgCl<sub>2</sub> (3). At 5-minute intervals, slices were then transferred into a series of 3 different  
535 chambers oxygenated (95% O<sub>2</sub>/5% CO<sub>2</sub>) in the same base ACSF but with the following  
536 temperature and component (in mM) variations: **1.** 21°C initially with MgCl<sub>2</sub> (1) and CaCl<sub>2</sub>  
537 (0.5) then allowed to heat gradually to 36°C; **2.** 36°C with MgCl<sub>2</sub> (1) and CaCl<sub>2</sub> (1); and **3.**  
538 36°C initially with MgCl<sub>2</sub> (1) and CaCl<sub>2</sub> (2) before cooling to 21°C. Slices were then left for at  
539 least 1 hour before recordings commenced.

540

541 Evoked recordings were performed on an upright microscope continually perfused with  
542 oxygenated recording solution at room temperature containing the same ACSF composition  
543 as the third chamber and supplemented with 10 µM bicuculline. Pyramidal cells in the CA1  
544 region were held at -60 mV in whole-cell voltage-clamp configuration using glass  
545 microelectrodes (resistance 3-8 MΩ) filled with caesium gluconate intracellular solution  
546 containing (in mM): D-gluconic acid lactone (130), HEPES (10), EGTA (10), NaCl (10), CaCl<sub>2</sub>  
547 (0.5), MgCl<sub>2</sub>(1), ATP (1) and GTP (0.5), QX314 (5), pH to 7.2 with CsOH. To evoke  
548 postsynaptic EPSCs, a bipolar concentric stimulation electrode (FHC) was placed in the SC  
549 fibres of the CA3 region. For input-output recordings, the stimulus pulse was varied between  
550 0.2 and 1 mA with a pulse width of 0.1 millisecond (ms) and stimuli were delivered at a rate

551 of 0.1 Hz. Paired pulse stimuli were given at rate of 0.2 Hz with different inter-stimulus  
552 intervals, ranging from 25 ms to 200 ms and a stimulation strength set to approximately 50%  
553 of the maximal response for each cell. PPR was calculated as the ratio of the peak amplitude  
554 of the second response over the first response. Calculation of RRP size, initial fusion  
555 efficiency and SV recycling rate was done on ESPC recordings that underwent 3 s duration  
556 trains of stimulation at 20Hz and estimated as previously described (54, 69). Briefly, RRP  
557 size, fusion efficiency ( $fe$ ) and vesicle recycling rate ( $\alpha$ ) were evaluated from the cumulative  
558 charge during the stimulation train using the following two equations:

559

560 **Equation 1:** 
$$fe = \frac{r(1)}{r(\infty)} (1 - \exp(-\alpha\Delta t))$$

561

562 
$$fe = \frac{r(1)}{\sum_{i=1}^s r(i) \exp(-\alpha(S-i)\Delta t)}$$
  
563 **Equation 2:** 
$$fe = \frac{r(1)}{\sum_{i=1}^s r(i) \exp(-\alpha(S-i)\Delta t)}$$

564

565  $r(1)$  is the charge of the first EPSC in the train

566  $r(i)$  the charge passed by the  $i$ th EPSC

567  $r(\infty)$  was calculated from the average charge of the last 10 EPSCs in the train

568  $\Delta t$  is the stimulus interval in the train

569 The RRP was estimated as  $RRP=r(1)/fe$ .

570

571 All currents were recorded using an Axopatch 200B amplifier, filtered (1 kHz) and digitised

572 (10 kHz). Data were monitored online and analysed offline using WinEDR and WinWCP

573 software (available free online at [http://spider.science.strath.ac.uk/sipbs/software\\_ses.htm](http://spider.science.strath.ac.uk/sipbs/software_ses.htm)).

574 Stimulus artefacts in representative traces were digitally removed for clarity.

575

## 576 **Statistical analysis**

577 All experiments were performed at least three times. All calculations and graphs were

578 performed with ImageJ, Microsoft Excel and GraphPad Prism software. P-values were

579 calculated using two-tailed Student's unpaired or paired (*in vitro* budding) t-tests, two-way  
580 ANOVA with repeated measures (electrophysiology), one-way ANOVA followed by Holm-  
581 Sidak correction for multiple comparison or one-way ANOVA for preselected pairs without  
582 correction for multiple comparison (clathrin biophysical properties). Detailed statistical  
583 information including statistical tests used, number of independent experiments, P-values  
584 and definition of error bars is described in individual figure legends.

585

#### 586 **Additional methods**

587 Details on methods for protein purification and assays, mouse genotyping and behavioural  
588 tests, electron microscopy and ultrastructure analysis are in SI Appendix, Materials and  
589 Methods.

590

#### 591 **Data availability**

592 Protein expression vectors, non-commercial antibodies and mouse strains produced in this  
593 study are available upon request. All data generated and analysed for this study and  
594 associated protocols are included in the main text or SI Appendix.



595 **ACKNOWLEDGMENTS**

596 This work was supported by grants to F. M. B. from the Wellcome Trust (107858/Z/15/Z), to  
597 P.C.S. from the Medical Research Council (MR/M024083/1) and to P.C.S. and E. P. from  
598 Alzheimer's Research UK (ARUK-PG2018A-002). L. R. was supported by a Wellcome Trust  
599 4-year interdisciplinary PhD studentship. J. J. B. was supported by MRC funding to the MRC  
600 Laboratory of Molecular Cell Biology at UCL, award code MC\_U12266B. P. N. D. was  
601 supported by a UCL Excellence Fellowship. The authors would like to acknowledge UCL  
602 IQPath, UCL Institute of Neurology, Queen Square London, WC1N 3BG for processing  
603 tissue slices for H&E staining and Massimo Signore (ICH) and Anna Crowley (KLB  
604 Transgenic facility, UCL) for the generation of the *Cltb*<sup>ko</sup> mouse strain.

605

606 **AUTHOR CONTRIBUTIONS**

607 The study was conceived by L. R. and F. M. B. with expert input from P. N. D., F. M., E. P.  
608 and P. C. S. and the project was managed by F.M.B. Electrophysiology experiments were  
609 conducted and analysed by F. M. All *in vitro* reconstitution, protein level and EM experiments  
610 and analyses were carried out by L. R. with expert assistance from J. J. B., F. M., E. P., P. N.  
611 D. and K. B. Mouse behaviour data and survival characteristics were collected by Y. C. and  
612 M. D. C. The paper was written by L. R., F. M. B., F. M. and P. C. S. and then all authors  
613 read and commented on the paper.

614

615 **COMPETING INTEREST**

616 The authors declare no competing interest.

617

618 **REFERENCES**

619

- 620 1. F. M. Brodsky, Diversity of clathrin function: new tricks for an old protein. *Annu Rev*  
621 *Cell Dev Biol* **28**, 309-336 (2012).
- 622 2. T. Soykan, T. Maritzen, V. Haucke, Modes and mechanisms of synaptic vesicle  
623 recycling. *Curr Opin Neurobiol* **39**, 17-23 (2016).
- 624 3. H. T. McMahon, E. Boucrot, Molecular mechanism and physiological functions of  
625 clathrin-mediated endocytosis. *Nat Rev Mol Cell Biol* **12**, 517-533 (2011).
- 626 4. P. N. Dannhauser *et al.*, CHC22 and CHC17 clathrins have distinct biochemical  
627 properties and display differential regulation and function. *J Biol Chem* **292**, 20834-  
628 20844 (2017).
- 629 5. A. P. Jackson, H. F. Seow, N. Holmes, K. Drickamer, P. Parham, Clathrin light chains  
630 contain brain-specific insertion sequences and a region of homology with  
631 intermediate filaments. *Nature* **326**, 154-159 (1987).
- 632 6. T. Kirchhausen *et al.*, Clathrin light chains LCA and LCB are similar, polymorphic, and  
633 share repeated heptad motifs. *Science* **236**, 320-324 (1987).
- 634 7. D. E. Wakeham *et al.*, Clathrin heavy and light chain isoforms originated by  
635 independent mechanisms of gene duplication during chordate evolution. *Proc Natl*  
636 *Acad Sci U S A* **102**, 7209-7214 (2005).
- 637 8. M. Fumagalli *et al.*, Genetic diversity of CHC22 clathrin impacts its function in glucose  
638 metabolism. *eLife* **8** (2019).
- 639 9. S. Wu *et al.*, Clathrin light chains' role in selective endocytosis influences antibody  
640 isotype switching. *Proc Natl Acad Sci U S A* **113**, 9816-9821 (2016).
- 641 10. J. Giudice *et al.*, Alternative splicing regulates vesicular trafficking genes in  
642 cardiomyocytes during postnatal heart development. *Nat Commun* **5**, 3603 (2014).
- 643 11. M. Mettlen *et al.*, Endocytic accessory proteins are functionally distinguished by their  
644 differential effects on the maturation of clathrin-coated pits. *Mol Biol Cell* **20**, 3251-  
645 3260 (2009).
- 646 12. O. M. Tsygankova, J. H. Keen, A unique role for clathrin light chain A in cell  
647 spreading and migration. *J Cell Sci* 10.1242/jcs.224030 (2019).
- 648 13. P. H. Chen *et al.*, Crosstalk between CLCb/Dyn1-mediated adaptive clathrin-  
649 mediated endocytosis and epidermal growth factor receptor signaling increases  
650 metastasis. *Dev Cell* **40**, 278-288.e275 (2017).
- 651 14. M. Biancospino *et al.*, Clathrin light chain A drives selective myosin VI recruitment to  
652 clathrin-coated pits under membrane tension. *Nat Commun* **10**, 4974 (2019).
- 653 15. H. Maib, F. Ferreira, S. Vassilopoulos, E. Smythe, Cargo regulates clathrin-coated pit  
654 invagination via clathrin light chain phosphorylation. *J Cell Biol* **217**, 4253 (2018).

- 655 16. J. C. Stachowiak, F. M. Brodsky, E. A. Miller, A cost-benefit analysis of the physical  
656 mechanisms of membrane curvature. *Nat Cell Biol* **15**, 1019-1027 (2013).
- 657 17. J. A. Ybe *et al.*, Light chain C-terminal region reinforces the stability of clathrin heavy  
658 chain trimers. *Traffic* **8**, 1101-1110 (2007).
- 659 18. D. S. Chu, B. Pishvaei, G. S. Payne, The light chain subunit is required for clathrin  
660 function in *Saccharomyces cerevisiae*. *J Biol Chem* **271**, 33123-33130 (1996).
- 661 19. J. D. Wilbur *et al.*, Conformation switching of clathrin light chain regulates clathrin  
662 lattice assembly. *Dev Cell* **18**, 841-848 (2010).
- 663 20. D. H. Wong *et al.*, Neuron-specific expression of high-molecular-weight clathrin light  
664 chain. *J Neurosci* **10**, 3025-3031 (1990).
- 665 21. P. N. Dannhauser *et al.*, Effect of clathrin light chains on the stiffness of clathrin  
666 lattices and membrane budding. *Traffic* **16**, 519-533 (2015).
- 667 22. M. Lherbette, L. Redlingshofer, F. M. Brodsky, I. A. T. Schaap, P. N. Dannhauser,  
668 The AP2 adaptor enhances clathrin coat stiffness. *FEBS J* **286**, 4074-4085 (2019).
- 669 23. C. Y. Chen, F. M. Brodsky, Huntingtin-interacting protein 1 (Hip1) and Hip1-related  
670 protein (Hip1R) bind the conserved sequence of clathrin light chains and thereby  
671 influence clathrin assembly in vitro and actin distribution in vivo. *J Biol Chem* **280**,  
672 6109-6117 (2005).
- 673 24. J. D. Wilbur *et al.*, Actin binding by Hip1 (huntingtin-interacting protein 1) and Hip1R  
674 (Hip1-related protein) is regulated by clathrin light chain. *J Biol Chem* **283**, 32870-  
675 32879 (2008).
- 676 25. A. M. Schreij *et al.*, LRRK2 localizes to endosomes and interacts with clathrin-light  
677 chains to limit Rac1 activation. *EMBO Rep* **16**, 79-86 (2014).
- 678 26. J. E. Heuser, T. S. Reese, Evidence for recycling of synaptic vesicle membrane  
679 during transmitter release at the frog neuromuscular junction. *Journal of Cell Biology*  
680 **57**, 315-344 (1973).
- 681 27. S. Watanabe *et al.*, Clathrin regenerates synaptic vesicles from endosomes. *Nature*  
682 **515**, 228-233 (2014).
- 683 28. S. Watanabe, E. Boucrot, Fast and ultrafast endocytosis. *Curr Opin Cell Biol* **47**, 64-  
684 71 (2017).
- 685 29. S. F. Soukup, R. Vanhauwaert, P. Verstreken, Parkinson's disease: convergence on  
686 synaptic homeostasis. *EMBO J* **37**, e98960 (2018).
- 687 30. S. J. Koo *et al.*, Vesicular synaptobrevin/VAMP2 levels guarded by AP180 control  
688 efficient neurotransmission. *Neuron* **88**, 330-344 (2015).
- 689 31. M. Cao *et al.*, Parkinson Sac domain mutation in synaptojanin 1 impairs clathrin  
690 uncoating at synapses and triggers dystrophic changes in dopaminergic axons.  
691 *Neuron* **93**, 882-896.e885 (2017).
- 692 32. I. Milosevic *et al.*, Recruitment of endophilin to clathrin-coated pit necks is required for  
693 efficient vesicle uncoating after fission. *Neuron* **72**, 587-601 (2011).

- 694 33. N. L. Kononenko *et al.*, Clathrin/AP-2 mediate synaptic vesicle reformation from  
695 endosome-like vacuoles but are not essential for membrane retrieval at central  
696 synapses. *Neuron* **82**, 981-988 (2014).
- 697 34. Y.-I. Yim *et al.*, Endocytosis and clathrin-uncoating defects at synapses of auxilin  
698 knockout mice. *Proc Natl Acad Sci U S A* **107**, 4412 (2010).
- 699 35. T. Mitsunari *et al.*, Clathrin adaptor AP-2 is essential for early embryonal  
700 development. *Mol Cell Biol* **25**, 9318-9323 (2005).
- 701 36. A. Musacchio *et al.*, Functional organization of clathrin in coats: combining electron  
702 cryomicroscopy and X-ray crystallography. *Mol Cell* **3**, 761-770 (1999).
- 703 37. K. L. Morris *et al.*, Cryo-EM of multiple cage architectures reveals a universal mode of  
704 clathrin self-assembly. *Nat Struct Mol Biol* **26**, 890-898 (2019).
- 705 38. W. K. den Otter, M. R. Renes, W. J. Briels, Self-assembly of three-legged patchy  
706 particles into polyhedral cages. *J Phys: Condens Matter* **22**, 104103 (2010).
- 707 39. A. Fotin *et al.*, Molecular model for a complete clathrin lattice from electron  
708 cryomicroscopy. *Nature* **432**, 573-579 (2004).
- 709 40. F. Baschieri *et al.*, Frustrated endocytosis controls contractility-independent  
710 mechanotransduction at clathrin-coated structures. *Nat Commun* **9**, 3825 (2018).
- 711 41. S. Schein, Architecture of clathrin fullerene cages reflects a geometric constraint--the  
712 head-to-tail exclusion rule--and a preference for asymmetry. *J Mol Biol* **387**, 363-375  
713 (2009).
- 714 42. F. K. Winkler, K. K. Stanley, Clathrin heavy chain, light chain interactions. *EMBO J* **2**,  
715 1393-1400 (1983).
- 716 43. P. K. Nandi, H. T. Pretorius, R. E. Lippoldt, M. L. Johnson, H. Edelhoch, Molecular  
717 properties of the reassembled coat protein of coated vesicles. *Biochemistry* **19**, 5917-  
718 5921 (1980).
- 719 44. P. P. Van Jaarsveld, P. K. Nandi, R. E. Lippoldt, H. Saroff, H. Edelhoch,  
720 Polymerization of clathrin protomers into basket structures. *Biochemistry* **20**, 4129-  
721 4135 (1981).
- 722 45. J. Heuser, T. Kirchhausen, Deep-etch views of clathrin assemblies. *J Ultrastruct Res*  
723 **92**, 1-27 (1985).
- 724 46. E. Ungewickell, H. Ungewickell, Bovine brain clathrin light chains impede heavy chain  
725 assembly in vitro. *J Biol Chem* **266**, 12710-12714 (1991).
- 726 47. B. Greene, S. H. Liu, A. Wilde, F. M. Brodsky, Complete reconstitution of clathrin  
727 basket formation with recombinant protein fragments: adaptor control of clathrin self-  
728 assembly. *Traffic* **1**, 69-75 (2000).
- 729 48. S.-H. Liu, M. L. Wong, C. S. Craik, F. M. Brodsky, Regulation of clathrin assembly  
730 and trimerization defined using recombinant triskelion hubs. *Cell* **83**, 257-267 (1995).
- 731 49. P. N. Dannhauser, E. J. Ungewickell, Reconstitution of clathrin-coated bud and  
732 vesicle formation with minimal components. *Nat Cell Biol* **14**, 634-639 (2012).

- 733 50. O. Avinoam, M. Schorb, C. J. Beese, J. A. G. Briggs, M. Kaksonen, Endocytic sites  
734 mature by continuous bending and remodeling of the clathrin coat. *Science* **348**,  
735 1369-1372 (2015).
- 736 51. B. L. Scott *et al.*, Membrane bending occurs at all stages of clathrin-coat assembly  
737 and defines endocytic dynamics. *Nat Commun* **9**, 419 (2018).
- 738 52. S. Watanabe *et al.*, Ultrafast endocytosis at mouse hippocampal synapses. *Nature*  
739 **504**, 242-247 (2013).
- 740 53. L. E. Dobrunz, Release probability is regulated by the size of the readily releasable  
741 vesicle pool at excitatory synapses in hippocampus. *Int J Dev Neurosci* **20**, 225-236  
742 (2002).
- 743 54. J. F. Wesseling, D. C. Lo, Limit on the role of activity in controlling the release-ready  
744 supply of synaptic vesicles. *J Neurosci* **22**, 9708-9720 (2002).
- 745 55. C. F. Stevens, J. H. Williams, Discharge of the readily releasable pool with action  
746 potentials at hippocampal synapses. *J Neurophysiol* **98**, 3221-3229 (2007).
- 747 56. L. E. Dobrunz, C. F. Stevens, Heterogeneity of release probability, facilitation, and  
748 depletion at central synapses. *Neuron* **18**, 995-1008 (1997).
- 749 57. R. S. Zucker, W. G. Regehr, Short-term synaptic plasticity. *Annu Rev Physiol* **64**,  
750 355-405 (2002).
- 751 58. H. Shiotsuki *et al.*, A rotarod test for evaluation of motor skill learning. *J Neurosci*  
752 *Methods* **189**, 180-185 (2010).
- 753 59. S. Stamm *et al.*, Clathrin light chain B: gene structure and neuron-specific splicing.  
754 *Nucleic Acids Res* **20**, 5097-5103 (1992).
- 755 60. T. Kirchhausen, S. C. Harrison, P. Parham, F. M. Brodsky, Location and distribution  
756 of the light chains in clathrin trimers. *Proc Natl Acad Sci U S A* **80**, 2481-2485 (1983).
- 757 61. S. R. Majeed *et al.*, Clathrin light chains are required for the gyrating-clathrin recycling  
758 pathway and thereby promote cell migration. *Nat Commun* **5**, 3891 (2014).
- 759 62. S. L. Acton, Brodsky, F. M., Predominance of clathrin light chain LCb correlates with  
760 the presence of a regulated secretory pathway. *J Cell Biol* **111**, 1419-1426 (1990).
- 761 63. H. Heerssen, R. D. Fetter, G. W. Davis, Clathrin dependence of synaptic-vesicle  
762 formation at the *Drosophila* neuromuscular junction. *Curr Biol* **18**, 401-409 (2008).
- 763 64. K. Sato *et al.*, Differential requirements for clathrin in receptor-mediated endocytosis  
764 and maintenance of synaptic vesicle pools. *Proc Natl Acad Sci U S A* **106**, 1139-1144  
765 (2009).
- 766 65. V. Poupon *et al.*, Clathrin light chains function in mannose phosphate receptor  
767 trafficking via regulation of actin assembly. *Proc Natl Acad Sci U S A* **105**, 168-173  
768 (2008).
- 769 66. D. M. Valenzuela *et al.*, High-throughput engineering of the mouse genome coupled  
770 with high-resolution expression analysis. *Nat Biotechnol* **21**, 652-659 (2003).

- 771 67. I. S. Näthke *et al.*, Folding and trimerization of clathrin subunits at the triskelion hub.  
772 *Cell* **68**, 899-910 (1992).
- 773 68. F. M. Brodsky, Clathrin structure characterized with monoclonal antibodies. II.  
774 Identification of in vivo forms of clathrin. *J Cell Biol* **101**, 2055-2062 (1985).
- 775 69. L. Ciani *et al.*, Wnt signalling tunes neurotransmitter release by directly targeting  
776 Synaptotagmin-1. *Nat Commun* **6**, 8302 (2015).
- 777

778 **TABLES**

779

780 *Table 1: Regulation of clathrin lattice properties by CLC isoforms*

|                    | high |      |         |        |       | low   |
|--------------------|------|------|---------|--------|-------|-------|
| Lattice curvature  | CLCb | CLCa | nCLCa/b | CLCa/b | nCLCa | nCLCb |
| Lattice quality    | CLCb | CLCa | nCLCa/b | CLCa/b | nCLCa | nCLCb |
| Budding efficiency | CLCb | CLCa | nCLCa/b | CLCa/b | nCLCa | nCLCb |

781

782

783

784 **FIGURE LEGENDS**

785

786 **Fig. 1:** CLCs differentially affect lattice curvature via regulation at the CHC knee. **a** Pucker  
 787 (1) and knee (2) angles of the clathrin triskelion (black: CHC, blue: CLC) dictate lattice  
 788 architecture. Different knee angles (encircled, black straight and dashed lines) are adopted  
 789 for hexagon (non-curvature inducing) or pentagon (curvature inducing) formation (3, whole  
 790 triskelion in black and parts of others in grey). Lattice curvature is further amended through  
 791 changes in pucker angle (4, dashed and black lines), or changes in proximal leg-crossing  
 792 angle (5). CLC subunits are omitted for simplicity. Different sizes of closed cages are  
 793 achieved by varying numbers of hexagons and a fixed number of 12 pentagons (filled black,  
 794 based on (45)). **b** Quantification of the percentage of small cages (< 90 nm in diameter) in a  
 795 population of more than 200 cages, generated by *in vitro* assembly of clathrin reconstituted  
 796 with indicated CLCs, 1:1 mixtures of reconstituted clathrins (CLCa/b or nCLCa/b) or CHC  
 797 only (CHC), determined from electron micrographs (mean  $\pm$  SEM, \* $P$  < 0.05, \*\*\* $P$  < 0.001  
 798 one-way ANOVA followed by Holm-Sidak correction for multiple comparison,  $n$  = 3). **c** Cage  
 799 size distributions from assemblies of triskelia formed from full length CHC as described in **b**,  
 800 with CLC composition key in **d**. **d** Size distributions of cages formed from TDD (black) and  
 801 Hub (grey) co-assemblies, with Hub fragments reconstituted or not with the indicated CLC



802 isoforms or 1:1 mixtures thereof. **e** Representative EM images of cages formed from full-  
803 length CHC (top) or Hub/TDD fragments (bottom) without or following reconstitution with  
804 indicated CLC isoforms. Scale bar: 100 nm.

805

806 **Fig. 2:** CLC splicing and mixing affects *in vitro* lattice quality. **a** Clathrin reconstituted with  
807 indicated CLC isoforms and mixtures thereof were assembled into flat lattices and visualised  
808 by negative stain for EM analysis. Scale bar: 200 nm. **b** Quality (regularity quantified by  
809 Fourier transform) of lattices generated as in **a**, (mean  $\pm$  SEM,  $*P < 0.05$ ,  $**P < 0.01$ , one-  
810 way ANOVA followed by Holm-Sidak correction for multiple comparison,  $n = 5$ ). **c** Differences  
811 in lattice quality between indicated reconstituted clathrins in individual experiments as in **b**  
812 (data points and mean  $\pm$  SEM,  $n = 5$ ).

813

814 **Fig. 3:** CLC splicing and mixing affects *in vitro* lattice budding efficiency. **a** Representative  
815 EM images of clathrin reconstituted with indicated CLC isoforms, 1:1 mixtures thereof, CHC  
816 only (CHC) and tissue-derived clathrin (native) assemblies on  $H_6$ - $\Delta$ ENTH-epsin<sup>144-575</sup>-coated  
817 liposomes. Scale bar: 200 nm. **b** Quantification of the percentage of mature buds (defined as  
818 clathrin-coated membrane profiles with  $< 200$  nm fitted diameter) of more than 60,000 nm  
819 total clathrin-coated membrane profiles including flat, shallow and mature structures  
820 generated as in **a** (mean  $\pm$  SEM,  $*P < 0.05$ ,  $**P < 0.01$ , paired Student's t-test for native and  
821 CHC,  $n = 3$ , one-way ANOVA with repeated measures for CLC-reconstituted clathrin,  $n = 4$ ).  
822 **c** Differences in percentage of mature buds between indicated reconstituted clathrins in  
823 individual experiments in **b** (data points and mean  $\pm$  SEM,  $n = 4$ ). **d** Quantification of budding  
824 efficiency (% mature buds determined as in **b**, normalised to native) of reconstituted clathrins  
825 and mixtures thereof ( $*P < 0.05$ , one-way ANOVA for sets of neuronal or non-neuronal  
826 samples, followed by Holm-Sidak correction for multiple comparison,  $n = 3$ ,  $p = 0.052$ ,  
827 Student's t-test for neuronal and non-neuronal mixtures,  $n = 3$ ). **e** Parameters characterising  
828 coated buds (top); coat length  $c$ , membrane bud diameter  $d$ , neck width  $n$ , and budding angle



829  $\theta$ . Models of clathrin-mediated membrane deformation by transitional curvature generation  
830 and lattice rearrangement (middle) or lattice growth under constant lattice curvature (bottom).  
831 **f** Representative coat profiles for flat (left), shallow (middle), and mature budded (< 200 nm  
832 fitted diameter, right) structures. **g** to **i** Analysis of the dataset generated as shown in **a** for  
833 coated membrane parameters  $n$  (**g**),  $d$  (**h**) and  $c$  (**i**) as shown in **e** in relation to the  $\theta$  of each  
834 structure measured for all reconstituted clathrins within the same experiment. Inserts in **h**  
835 and **i** show the different correlations of these parameters as predicted according to the  
836 curvature transition (red, straight line) and constant curvature models (red, dashed line)  
837 shown in **e**.

838

839 **Fig. 4:** CLC composition regulates SV pool replenishment in hippocampal neurons. **a**  
840 Immunoblot of CLC KO and WT brain lysate for CHC (TD.1 antibody), CLCa (X16 antibody),  
841 CLCb (CLTB antibody) and actin (anti-beta-actin antibody). **b** Schematic illustration of  
842 stimulating and recording electrode setup in acute hippocampal slices. The synapses  
843 investigated are formed by a Schaffer-collateral (SC) axon (black) from a pyramidal neuron  
844 (black triangles, cell bodies) in the CA3 region synapsing with a receiving pyramidal neuron  
845 (grey triangle, cell body) in the CA1 region from which responses are recorded. Black circles  
846 denote dentate gyrus (DG) granule cell bodies. **c** Representative traces of evoked excitatory  
847 postsynaptic currents (EPSCs) following a 20 Hz electrical stimulation for 3 s in CLCa KO  
848 and WT hippocampal slices (left). Graphs (right) show the mean ( $\pm$  SEM) initial fusion  
849 efficiency, SV recycling rate and readily releasable pool (RRP) size calculated for all cells ( $n$   
850 = 9-11 cells from 3 animals/genotype;  $*P < 0.05$  and  $**P < 0.01$ , unpaired Student's t-test). **d**  
851 Representative traces of EPSCs following a 20 Hz electrical stimulation for 3 s in CLCb KO  
852 and WT hippocampus slices (left). Graphs (right) show the mean ( $\pm$  SEM) initial fusion  
853 efficiency, SV recycling rate and RRP size calculated for all cells ( $n = 11-12$  cells from 4  
854 animals/genotype;  $*P < 0.05$ , unpaired Student's t-test). **e** Representative EM images of  
855 excitatory synapses in the CA1 region of the hippocampus of CLCa WT, CLCa KO, CLCb

856 WT and CLCb KO. Scale bars; 300 nm. **f** to **m** Quantification of data extracted from EM  
857 images as in **e**. Graphs show SV density within 300 nm of the PSD (**e** and **i**), cumulative  
858 frequency distribution of SV size (**g** and **k**), postsynaptic density (PSD) length (**h** and **l**) and  
859 synapse density (**i** and **m**) expressed as mean  $\pm$  SEM ( $*P < 0.05$ , unpaired Student's t-test,  $n$   
860 = 3).

861

862 **Fig. 5:** Neuronal defects are compensated for in CLCb KO but not CLCa KO mice. **a** Input-  
863 output relationship of evoked excitatory postsynaptic currents (EPSCs) at CA1 synapses of  
864 WT and CLCa KO hippocampus slices. Traces show responses of representative cells at  
865 increasing stimulus intensity with an average of 3 responses for each stimulus strength  
866 (mean  $\pm$  SEM;  $n = 9-11$  cells from 3 animals/genotype;  $*P < 0.05$ , two-way ANOVA with  
867 repeated measures). **b** Input-output relationship of evoked EPSCs at CA1 synapses of WT  
868 and CLCb KO hippocampus slices. Traces show response of representative cells at  
869 increasing stimulus intensity with an average of 3 responses for each stimulus strength  
870 (mean  $\pm$  SEM;  $n = 12-15$  cells from 4 animals/genotype;  $*P < 0.05$ , two-way ANOVA with  
871 repeated measures). **c** Paired-pulse ratio (PPR) of evoked EPSCs at CA1 synapses of WT  
872 and CLCa KO hippocampal slices. Traces show responses of representative cells. Graph  
873 displays the mean PPR ( $P_2/P_1 \pm$  SEM) from all cells ( $n = 9-11$  cells from 3 animals/genotype)  
874 at different time intervals between paired pulses ( $***P < 0.001$ , unpaired Student's t-test). **d**  
875 PPR of EPSCs at CA1 synapses of WT and CLCb KO hippocampal slices. Traces show  
876 responses of representative cells. Graph displays the mean PPR ( $P_2/P_1 \pm$  SEM) from all cells  
877 ( $n = 12-15$  cells from 4 animals/genotype) at different time intervals between paired pulses. **e**  
878 Genotype distribution for CLCa KO ( $n = 590$ ) and CLCb KO ( $n = 359$ ) mice after weaning  
879 compared to expected distribution ( $****P < 0.0001$ , *Chi-square* test). **f** Performance in the  
880 accelerated rotarod test (latency to fall) by CLC KO (CLCa KO = 8, CLCb KO = 8) and  
881 control wild-type littermates (CLCa WT = 8, CLCb WT = 7) expressed as data points and  
882 mean  $\pm$  SEM ( $****P < 0.0001$ , unpaired Student's t-test). **g** Time to cross grid for CLCa KO ( $n$

883 = 10) and control mice (n = 10) expressed as data points and mean  $\pm$  SEM (\* $P$  < 0.05,  
884 unpaired Student's t-test). **h** Grip strength of CLCa KO (n = 10) and control mice (n = 11,  
885 gram-force relative grip strength over body weight) expressed as data points and mean  $\pm$   
886 SEM.

887

888 **Fig. 6:** Model of how neuronal CLC diversity regulates synaptic vesicle recycling and lattice  
889 properties. **a** CLC (cyan) neuronal splice inserts (arrowheads) are located near the TxD of  
890 the bound CHC (green, left, PDB: 3LVH). **b** CLC (cyan) neuronal splice inserts (stars) are  
891 near the CHC knee of the neighbouring triskelion (red or orange) within lattices (right, PDB:  
892 3IYV). Interaction between a neuronal splicing insert and the knee of an adjacent triskelion  
893 and/or adjacent CLC N-terminus (N) could promote conformational change in the CHC knee.  
894 As the formation of pentagons and hexagons requires different knee angles, this interaction  
895 could consequently influence lattice curvature (see Fig. 1a). **c** In WT mice (centre), a mix of  
896 nCLCa and nCLCb clathrin creates the appropriate biophysical properties to mediate SV  
897 generation from endosomal compartments (and possibly the plasma membrane, blue-green  
898 arrows). Loss of nCLCa (left) creates nCLCb clathrin lattices that are defective in efficient SV  
899 regeneration (blue arrows), resulting in decimated SV pools. Loss of nCLCb (right) creates  
900 nCLCa clathrin lattices, which are also less efficient in SV regeneration than WT, but able to  
901 maintain an overall increased SV pool by excess budding to compensate for reduced  
902 efficiency in acute SV pool replenishment (green arrows).

**Figure 1**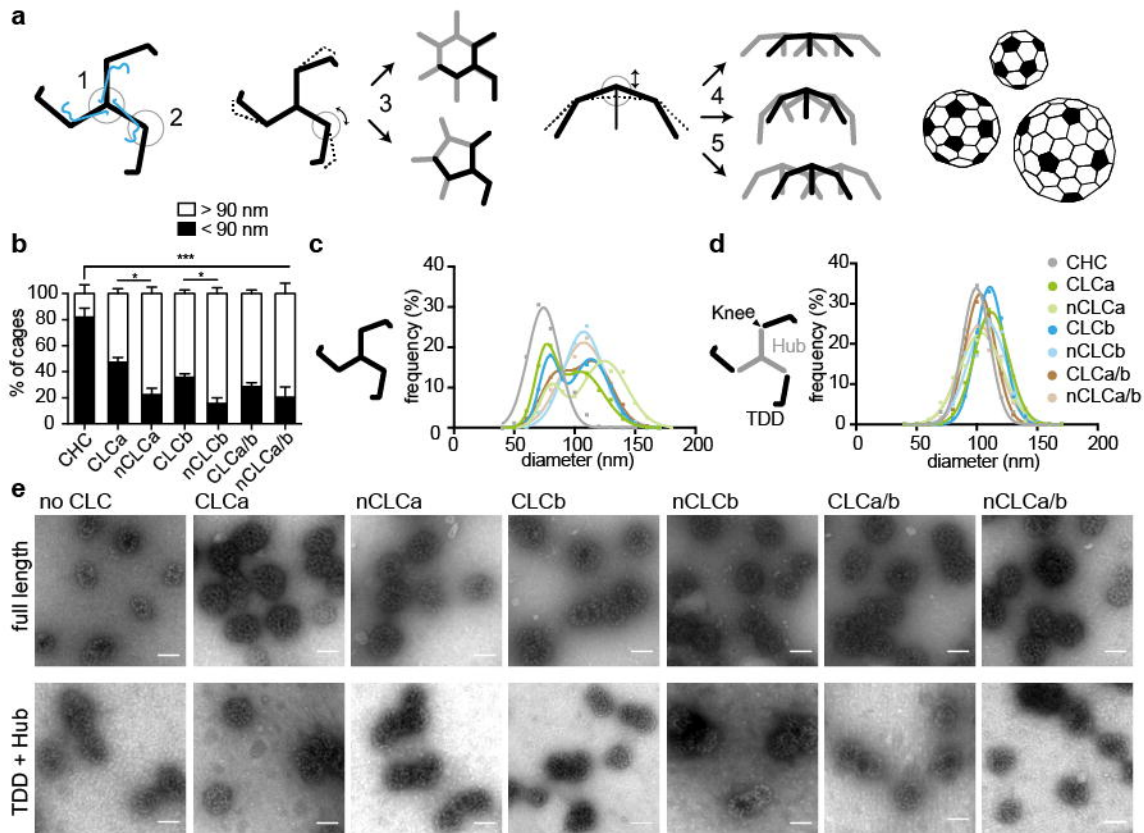

# Figure 2

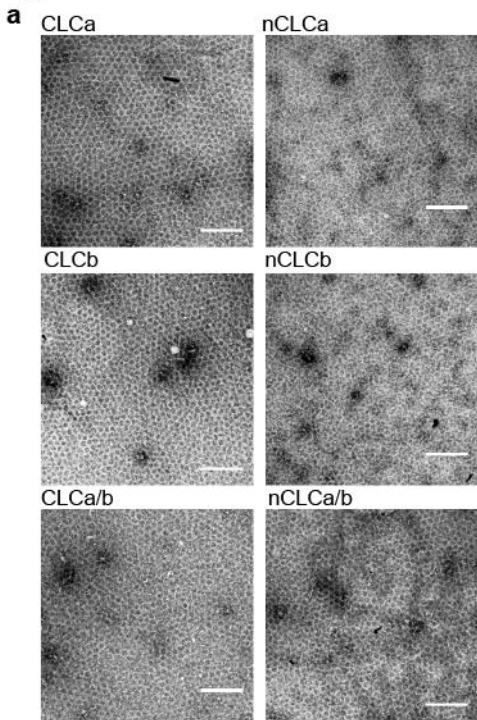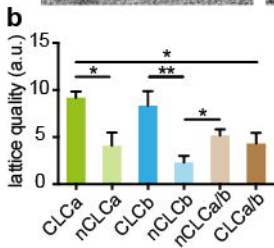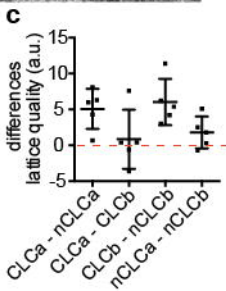

**Figure 3**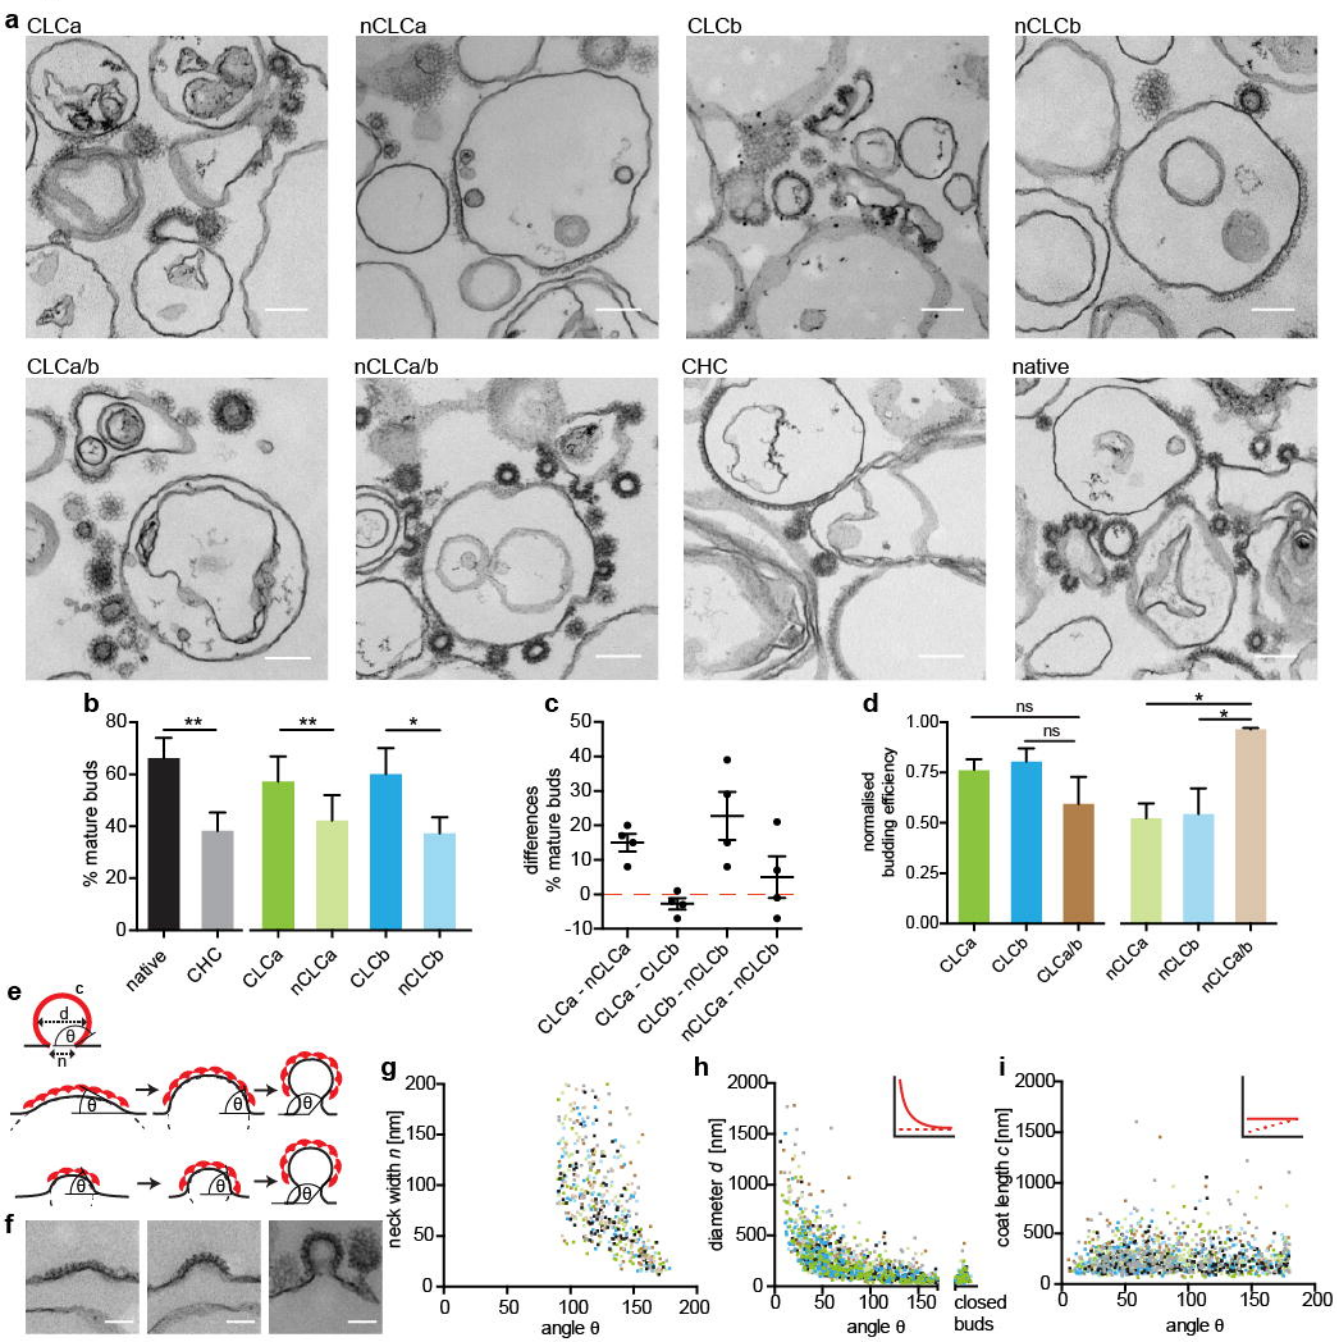



**Figure 4**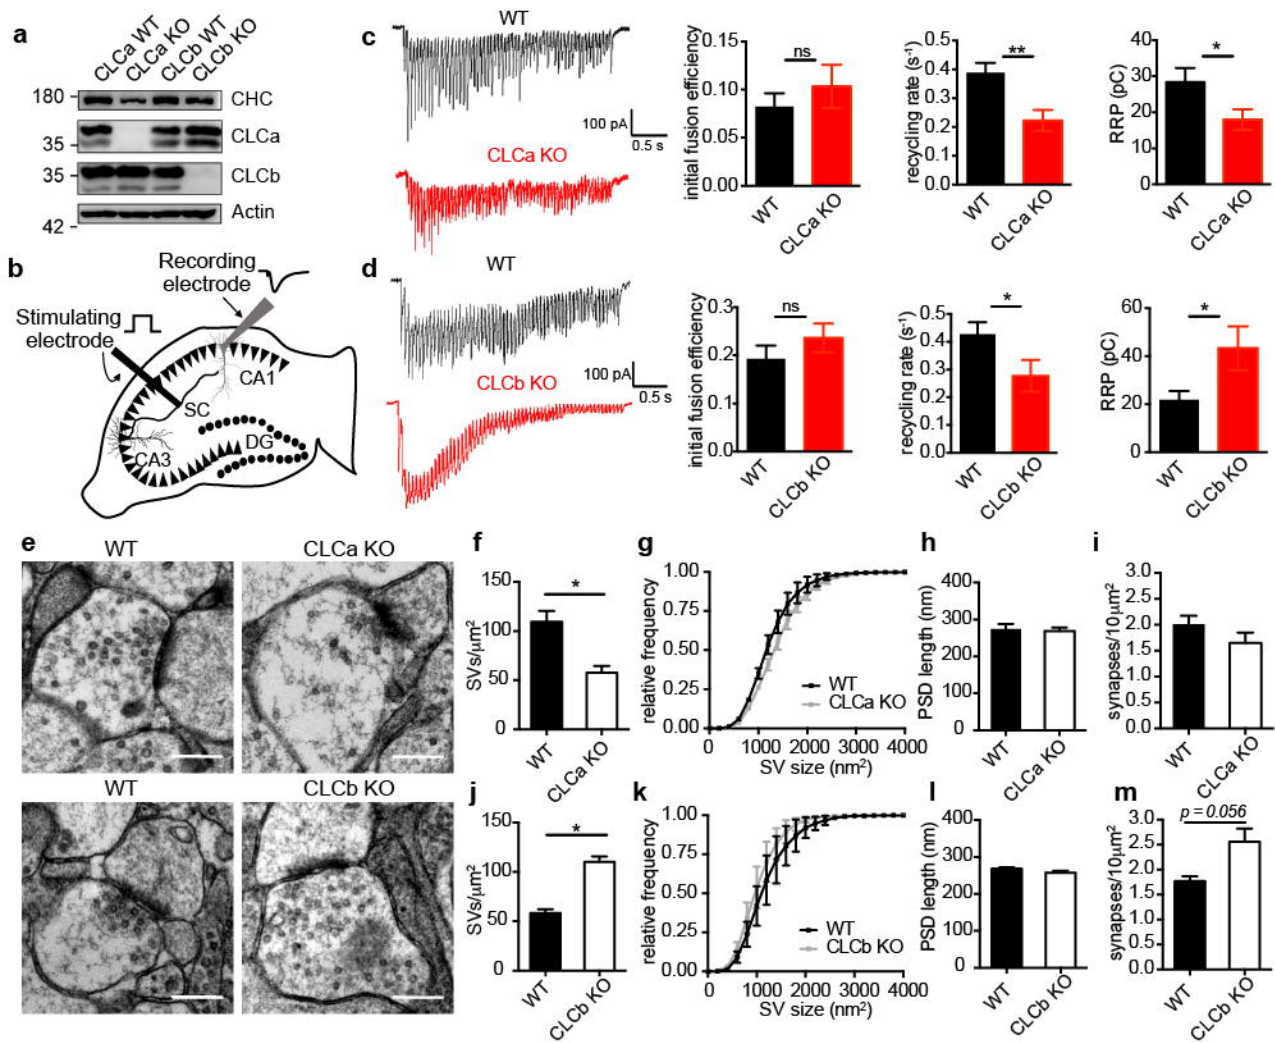

# Figure 5

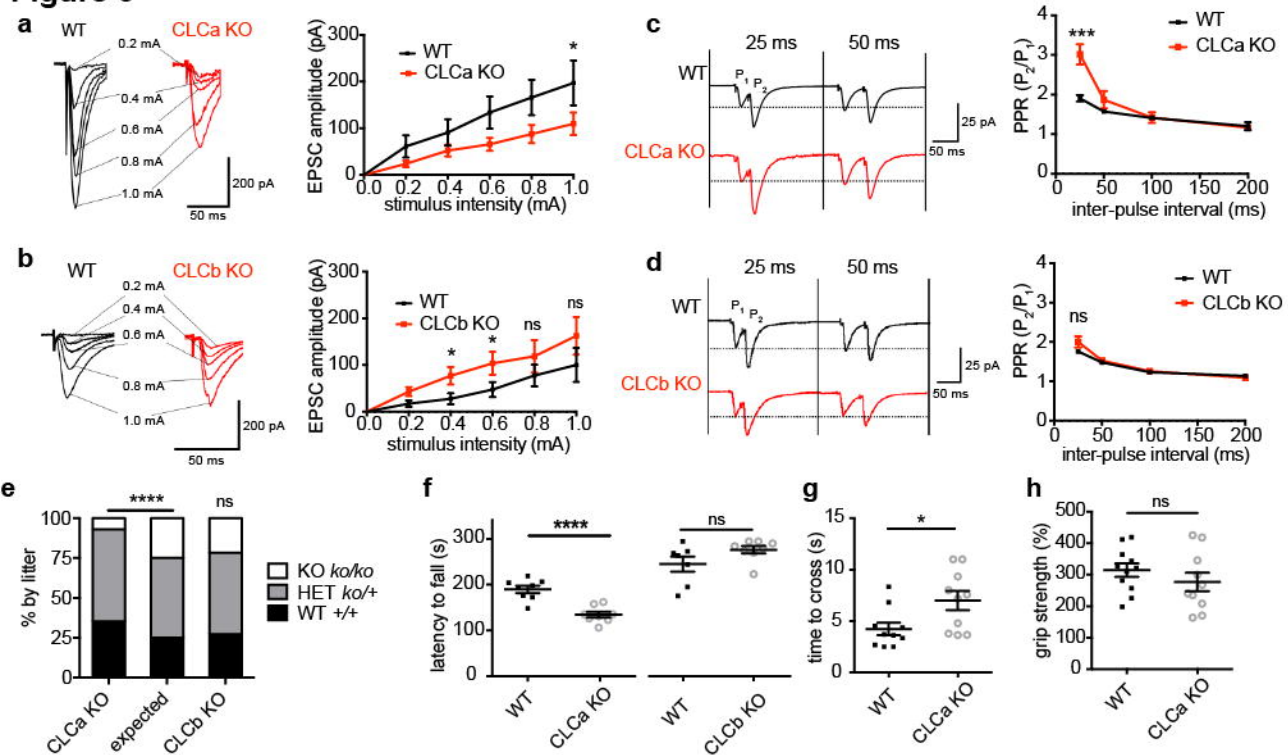



**Figure 6**

**a**

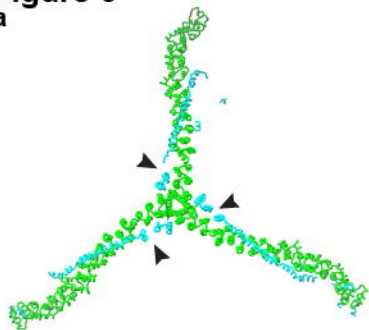

**b**

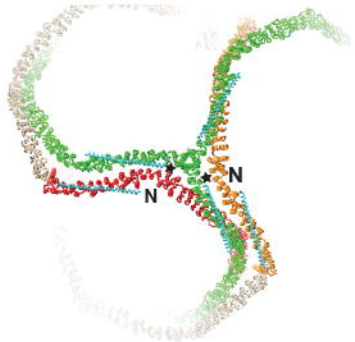

**c**

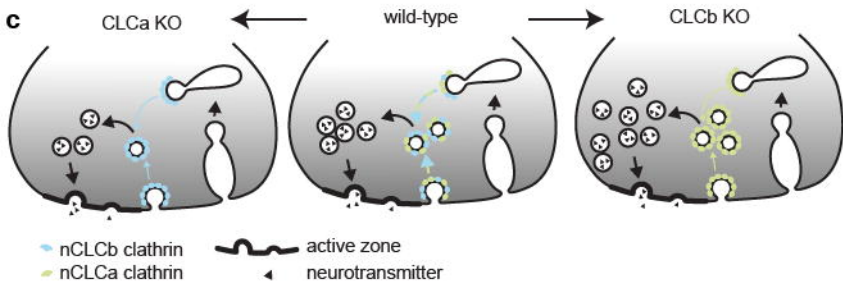

Source: https://www.biorxiv.org/content/10.1101/815183v3.full.pdf
